# Supplementary material
Source: PubMed Central journal article supplement (PMC5776072)
Supplement: NIHMS899774-supplement-Supplement.pdf [file NIHMS899774-supplement-Supplement.pdf]

## Supplemental Material

**Table S1.** Visual rating scores for the visualization of the lenticulostriate arteries in the pre-contrast and post-Ferumoxytol data for different volunteers (V1: Volunteer 1, V2: Volunteer 2, V3: Volunteer 3).

| Ferumoxytol  | MRA                               | SWI                   | tSWI                  | QSM                   |
|--------------|-----------------------------------|-----------------------|-----------------------|-----------------------|
| Dose         |                                   |                       |                       |                       |
| Pre-contrast | 1.0 (V1),<br>1.5(V2),<br>2.0 (V3) | 0 (all subjects)      | 0 (all subjects)      | 0 (all subjects)      |
| Post-1mg/kg  | -                                 | 3.0 (V3)              | 2.0 (V3)              | 2.0 (V3)              |
| Post-2mg/kg  | -                                 | 2.0 (V1),<br>3.0 (V2) | 2.0 (V1),<br>3.0 (V2) | 2.0 (V1),<br>3.0 (V2) |
| Post-3mg/kg  | -                                 | 2.5 (V3)              | 2.5 (V3)              | 1.5 (V3)              |
| Post-4mg/kg  | -                                 | 3.0 (V1)              | 3.0 (V1)              | 3.0 (V1)              |

**Table S2.** Visual rating scores for the visualization of the medullary veins in the pre-contrast and post-Ferumoxytol data for different volunteers (V1: Volunteer 1, V2: Volunteer 2, V3: Volunteer 3).

| Ferumoxytol  | MRA              | SWI                | tSWI                               | QSM                |
|--------------|------------------|--------------------|------------------------------------|--------------------|
| Dose         |                  |                    |                                    |                    |
| Pre-contrast | 0 (all subjects) | 1.0 (all subjects) | 1.0 (V1),<br>1.0 (V2),<br>1.5 (V3) | 1.0 (all subjects) |
| Post-1mg/kg  | -                | 1.5 (V3)           | 2.0 (V3)                           | 2.0 (V3)           |
| Post-2mg/kg  | -                | 2.0 (V1 and V2)    | 2.0 (V1),<br>3.0 (V2)              | 2.0 (V1 and V2)    |
| Post-3mg/kg  | -                | 2.5 (V3)           | 3.0 (V3)                           | 3.0 (V3)           |
| Post-4mg/kg  | -                | 3.0 (V1)           | 3.0 (V1)                           | 3.0 (V1)           |
